# Supplementary material for: Characteristics, Patterns of Care and Predictive Geriatric Factors in Elderly Patients Treated for High-Grade IDH-Mutant Gliomas: A French POLA Network Study
Source: MDPI journal article supplement (doi:10.3390/cancers14225509), 2022-11-09
Supplement: s1 [file s1]

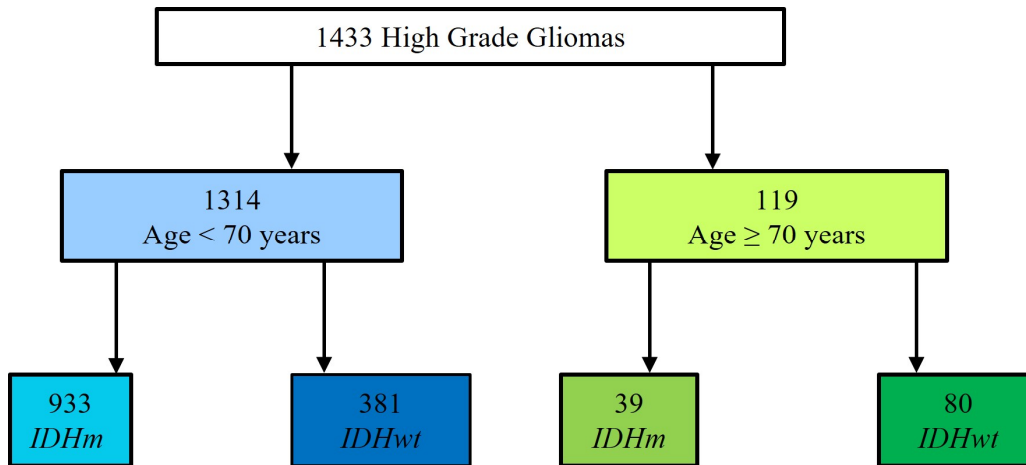

**Figure S1.** Patient repartition according to the age (< or ≥ 70 years) and the IDH mutation status in POLA cohort.

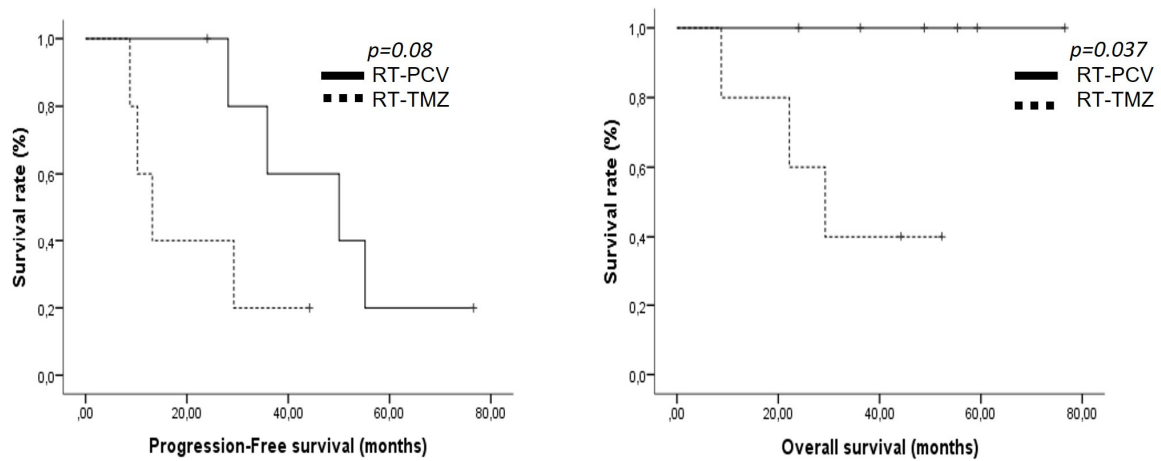

**Figure S2.** Progression free-survival (left) and overall survival (right) according to treatment groups in elderly patients with anaplastic oligodendroglioma. RT: radiotherapy; PCV: procarbazine, CCNU, Vincristine; TMZ: temozolomide.
