# Supplementary material for: Characteristics, Patterns of Care and Predictive Geriatric Factors in Elderly Patients Treated for High-Grade IDH-Mutant Gliomas: A French POLA Network Study
Source: MDPI journal article supplement (doi:10.3390/cancers14225509), 2022-11-09
Supplement: s1 [file s1]

**Supplementary Table S1. Baseline characteristics and treatment patterns in elderly patients *IDHm* HGG (Geriatric cohort, N=35) according to histological sub-type.**

| Characteristics                           | Oligodendroglioma (n=25) | Astrocytoma (n=9)     |
|-------------------------------------------|--------------------------|-----------------------|
|                                           | <i>N (% or range)</i>    | <i>N (% or range)</i> |
| Age (years, median, range)                | 74.0 (70.2 - 87.1)       | 73.1 (70.2-83.1)      |
| <b>Gender</b>                             |                          |                       |
| Male                                      | 14 (56)                  | 5 (55.6)              |
| Female                                    | 11 (44)                  | 4 (44.4)              |
| <b>Symptoms at diagnosis</b>              |                          |                       |
| Epilepsy                                  | 11 (44)                  | 4 (44.4)              |
| Cognitive disorders                       | 4 (16)                   | 3 (33.3)              |
| <b>Neuro-imaging characteristics</b>      |                          |                       |
| Contrast enhancement                      | 14 (70)                  | 8 (100)               |
| Necrosis                                  | 3 (25)                   | 3 (33.3)              |
| <b>Histological characteristics</b>       |                          |                       |
| Necrosis                                  | 6 (24)                   | 9 (100)               |
| Microvascular Proliferation               | 20 (80)                  | 4 (44.4)              |
| Ki 67 expression (mean, range)            | 20 (5-40)                | 10 (1-25)             |
| <b>Post-operative KPS (median, range)</b> | 80 (50-100)              | 70 (50-100)           |
| <b>Steroids intake</b>                    | 11 (55)                  | 2 (25)                |

|                                           |                  |             |
|-------------------------------------------|------------------|-------------|
| <b>Extent of resection</b>                |                  |             |
| Gross total /Subtotal                     | 7 (29.2)         | 2 (22.2)    |
| Partial                                   | 4 (16.7)         | 1 (11.1)    |
| Biopsy                                    | 13 (54.1)        | 6 (66.7)    |
| <b>Adjuvant Treatment</b>                 |                  |             |
| Wait and scan policy                      | 2 (8)            | 0           |
| Radiotherapy alone                        | 1 (4)            | 0           |
| Chemotherapy alone<br>TMZ<br>PCV          | 6 (24)<br>4 (16) | 6 (67)<br>0 |
| RT-TMZ                                    | 5 (20)           | 3 (33)      |
| RT-PCV                                    | 6 (24)           | 0           |
| Palliative care                           | 1 (4)            | 0           |
| <b>Cognitive disorders</b>                |                  |             |
| Neuropsychological disorders <sup>a</sup> | 4 (23.5)         | 3 (37.5)    |
| <b>Mobility</b>                           |                  |             |
| Get out without assistance                | 13 (81.3)        | 3 (37.5)    |
| <b>Comorbidities</b>                      |                  |             |
| Charlson's index $\geq 5$                 | 15 (65.2)        | 8 (88.9)    |
| Medications > 3                           | 6 (35.3)         | 3 (33.3)    |
| <b>Nutrition</b>                          |                  |             |

|                                                    |           |          |
|----------------------------------------------------|-----------|----------|
| Anorexia                                           | 2 (12.5)  | 4 (50)   |
| Weight loss                                        | 7 (41.2)  | 5 (62.5) |
| BMI < 21                                           | 4 (22.2)  | 3 (33.3) |
| <b>Autonomy</b>                                    |           |          |
| ADL < 6                                            | 3 (27.3)  | 3 (42.9) |
| IADL < 4                                           | 6 (54.5)  | 2 (33.3) |
| <b>Not a good self-reported state of health</b>    | 2 (16.7)  | 4 (80)   |
| <b>G8 score estimation <math>\leq 14/17</math></b> | 10 (58.8) | 6 (75)   |

KPS: Karnofsky Performance Scale; BMI: Body Mass Index; ADL: Activities of Daily Living; IADL: Instrumental Activities of Daily Living.

<sup>a</sup> Neuropsychological disorder assessed by G8 score.

**Supplementary Table S2. Treatment feasibility and toxicity in elderly patients according to chemotherapy adjuvant protocol (N=29).** TMZ: temozolomide; PCV: procarbazine, CCNU, vincristine.

|                                                              | <b>TMZ<br/>N (%)</b> | <b>PCV<br/>N (%)</b> |
|--------------------------------------------------------------|----------------------|----------------------|
| <i>Number of patients</i>                                    | 19                   | 10                   |
| <b>Number of cycles: <math>\geq 6</math> (TMZ); =6 (PCV)</b> | 13 (72.3)            | 5 (50)               |
| <b>Dose reduction at treatment initiation</b>                | 7 (41.1)             | 5 (62.5)             |
| <b>Dose reduction maintaining (without AE)</b>               | 3 (18.8)             | 1 (12.5)             |
| <b>Dose reduction during treatment due to AE</b>             | 3 (18.8)             | 7 (87.5)             |
| <b>Treatment interruption due to AE</b>                      | 2 (12.5)             | 6 (75)               |
| <b>AE grade <math>\geq 3</math></b>                          | 3 (16)               | 2 (20)               |

TMZ: Temozolomide; PCV: Procarbazine, CCNU, Vincristine; AE: Adverse Events grading with Criteria scale for adverse events version 4.0.

**Supplementary Table S3. Treatment toxicity in elderly patients according to chemotherapy adjuvant protocol (N=29).**

|                                                                   | TMZ (N=19)<br>N (%) |          | PCV (N=10)<br>N (%) |          |
|-------------------------------------------------------------------|---------------------|----------|---------------------|----------|
| <i>CTCAE</i>                                                      | Grade 1 or 2        | Grade ≥3 | Grade 1 or 2        | Grade ≥3 |
| <b>Haemoglobin decrease</b>                                       | 1 (5.2)             | -        | -                   | -        |
| <b>Platelet count decrease</b>                                    | 3 (15.8)            | 1 (5.2)  | 2 (20)              | 1 (10)   |
| <b>Neutropenia</b>                                                | 1(5.2)              | -        | 2 (20)              | -        |
| <b>Febrile neutropenia</b>                                        | -                   | -        | -                   | -        |
| <b>Urinary infection</b>                                          | -                   | -        | 1 (10)              | -        |
| <b>Lymphopenia</b>                                                | -                   | 1 (5.2)  | -                   | -        |
| <b>Asthenia/Fatigue</b>                                           | 8 (42.1)            | -        | 3 (30)              | 3 (30)   |
| <b>Anorexia/Weight loss</b>                                       | 3 (15.8)            | -        | -                   | 1 (10)   |
| <b>Constipation</b>                                               | 1 (5.2)             | -        | 1 (10)              | -        |
| <b>Nausea/Vomiting</b>                                            | 2 (10.5)            | -        | 1 (10)              | -        |
| <b>Cutaneous AE<br/>(dermatitis, allergic<br/>rash, alopecia)</b> | 1 (5.2)             | -        | 1 (10)              | -        |
| <b>Neuropathy</b>                                                 | -                   | -        | 2 (20)              | -        |

|                               |   |   |   |   |
|-------------------------------|---|---|---|---|
| <b>Thromboembolic event</b>   | - | - | - | - |
| <b>Liver enzyme elevation</b> | - | - | - | - |

TMZ: Temozolomide; PCV: Procarbazine, CCNU, Vincristine; AE: Adverse Events grading with Criteria scale for adverse events version 4.0.

**Supplementary Table S4. Predictive factors of treatment toxicity in elderly *IDH* mutated high-grade glioma cohort (N=34).**

|                               | <b>AE grade <math>\geq 3</math></b> | <b>Treatment interruption due to toxicity</b> |
|-------------------------------|-------------------------------------|-----------------------------------------------|
|                               | <i>p-value</i>                      | <i>p-value</i>                                |
| <b>G8 score (items)</b>       |                                     |                                               |
| Anorexia                      | 0.690                               | 0.279                                         |
| Weight loss                   | 0.082                               | 0.174                                         |
| Mobility                      | 0.362                               | 0.047                                         |
| Neuropsychological disorders  | 0.380                               | 0.490                                         |
| BMI                           | 0.290                               | 0.115                                         |
| Number of medications > 3     | 1.000                               | 0.631                                         |
| Self-reported state of health | 0.004                               | 0.443                                         |
| Age ranges                    | 1.000                               | 0.234                                         |
| <b>Autonomy</b>               |                                     |                                               |
| ADL                           | 0.268                               | 0.245                                         |
| IADL                          | 0.538                               | 0.231                                         |
| <b>Charlson's index score</b> | 1.000                               | 1.000                                         |
| <b>Post-operative KPS</b>     | 0.013                               | 0.529                                         |

AE: Adverse events grading with Criteria scale for adverse events version 4.0; BMI: Body Mass Index; ADL: Activities of Daily Living, IADL: Instrumental Activities of Daily Living, KPS: Karnofsky Performance Scale.
